# Supplementary material for: Population exposure to outdoor NO 2 , black carbon, particle mass, and number concentrations over Paris with multi-scale modelling down to the street scale
Source: Copernicus journal article supplement (doi:10.5194/egusphere-2024-2120), 2024-10-07
Supplement: Supplementary file [file egusphere-2024-2120-AC1-supplement.pdf]

# Population exposure to outdoor NO<sub>2</sub>, black carbon, particle mass, and number concentrations over Paris with multi-scale modelling down to the street scale

Soo-Jin Park<sup>1</sup>, Lya Lugon<sup>1</sup>, Oscar Jacquot<sup>1</sup>, Youngseob Kim<sup>1</sup>, Alexia Baudic<sup>7</sup>, Barbara D'Anna<sup>8</sup>, Ludovico Di Antonio<sup>3</sup>, Claudia Di Biagio<sup>4</sup>, Fabrice Dugay<sup>7</sup>, Olivier Favez<sup>5</sup>, Véronique Gherzi<sup>7</sup>, Aline Gratien<sup>4</sup>, Julien Kammer<sup>8</sup>, Jean-Eudes Petit<sup>6</sup>, Olivier Sanchez<sup>7</sup>, Myrto Valari<sup>2</sup>, Jérémy Vigneron<sup>7</sup>, and Karine Sartelet<sup>1</sup>

<sup>1</sup>CEREA, Ecole des Ponts, EDF R & D, IPSL, Marne-la-vallée, France

<sup>2</sup>LMD/IPSL, École Polytechnique, Université Paris Saclay, ENS, PSL Research University, Sorbonne Universités, UPMC Univ, France

<sup>3</sup>Université Paris Est Créteil and Univ. Paris Cité, CNRS, LISA, F-94010 Créteil, France

<sup>4</sup>Université Paris Cité and Univ. Paris Est Créteil, CNRS, LISA, F-75013 Paris, France

<sup>5</sup>INERIS, 60550 Verneuil en Halatte, France

<sup>6</sup>Laboratoire des Sciences du Climat et l'Environnement, CEA/Orme des Merisiers, 91191 Gif-sur-Yvette, France

<sup>7</sup>Airparif, 75004, Paris, France

<sup>8</sup>Aix Marseille Univ, CNRS, LCE, Marseille, France

## Reply to reviewer 1

### *Overall Evaluation:*

*The study presents a valuable approach by using a coupled WRF-CHIMERE/MUNICH/SSH-aerosol model to simulate pollutant concentrations such as NO<sub>2</sub>, black carbon (BC), PM<sub>2.5</sub>, and particle number (PN) at the street level, and evaluating population exposure in the Greater Paris region. The topic is timely and important, especially given the underestimation of population exposure to pollutants like NO<sub>2</sub>, BC, and PN when only using regional-scale models. The study includes an impressive range of input data and models, and the results are potentially impactful. However, there are some significant issues related to the structure, clarity, and depth of analysis that need to be addressed to improve the overall quality of the paper.*

10

### **Major Comments:**

#### *1. Imbalance Between Technical Details and Discussion:*

*While the technical details are thorough, there is insufficient analysis and discussion of the results. The paper would benefit from a deeper exploration of the trade-offs between traditional regional-scale models and street-level models. Specifically,*

15

*discuss how much computational resources are required for street-level models and how much additional accuracy is gained in comparison.*

**Our reply:** Sentences were added in Section 2.1 to further discuss the trade-offs between traditional regional-scale models and street-level models in terms of CPU time: “Using a one-way coupling approach, the regional-scale and local-scale simulations are performed sequentially. For the regional scale, the two-month simulation using WRF-CHIMERE models requires approximately 11520 hours×processors. The local scale simulations are less expensive, and the two-month simulation with the MUNICH model requires around 7680 hours×processors to simulate the street concentrations in the Parisian street-network composed of 4655 streets.

25

The advantage of the coupled system is now better emphasized in the introduction: "The coupled systems represent concentrations from the regional down to the street scales, taking into account all emission sources and secondary particle formation at all scales consistently (Lugon et al., 2022). "

30 and it is also better emphasized in the conclusion: "The regional-scale simulation provides a comprehensive representation of urban background concentrations, but lacks the ability to estimate fine-scale concentrations. Conversely, the street-level simulation adopts a higher spatial resolution and provides more accurate concentration estimates, which are critical for assessing population exposure. The additional computational resources required for street-scale simulation are balanced by the improved accuracy in representing spatial variability, which is essential for effective urban air quality management.

35

Additionally, in order to provide a more precise analysis and validation of the model results, we have included tables of the statistical indicators at each measurement station in the Supplementary document.

## *2. Introduction Structure:*

40

*The introduction lacks a clear, logical flow and does not effectively highlight the key research gap. It would be helpful to reorganize the introduction to show a more coherent development of the research problem and objectives, making it easier for readers to understand the motivation behind the study.*

45 **Our reply:** The introduction has been revised to improve its clarity and logical flow, effectively highlighting the key research gap. In particular, we emphasized the limitations and research gap in previous studies regarding population exposure compared to this study. The introduction is now structured in five main parts: importance to characterize BC and UFP concentrations, difficulties encountered in modelling BC and UFP, limitations in estimation of population exposure to outdoor concentrations at residences using deterministic modelling, limitations in urban modelling for multi-pollutants, and plan of the paper.

50 "In metropolises, characterised by densely populated and extensively developed areas, air pollution remains a major concern due to the presence of numerous emission sources, such as traffic, energy consumption, solvents, industrial activities. Traffic emissions receive particular attention because of their influence on local concentrations, with an impact of both exhaust and non-exhaust emissions (Fu et al., 2020; Jereb et al., 2021; Holnicki et al., 2021; Sarica et al., 2023). Environmental regulations aim to reduce key air pollutant concentrations, such as NO<sub>2</sub>, O<sub>3</sub>, and fine particulate matter (PM<sub>2.5</sub>). Although a large part  
55 of the health impacts are attributed to particles (Southerland et al., 2022), the health effects associated with different particle compounds and different particle size can vary considerably (Park et al., 2018; WHO, 2021; Haddad et al., 2024). In particular, black carbon (BC) and ultra-fine particles (diameter lower than 0.1 μm) are considered "priority" emerging pollutants (WHO, 2021; Goobie et al., 2024), as stated in the European air-quality directives promulgated in October 2024. Long-term exposure to ultra-fine particles is associated with increased mortality (Li et al., 2023b), while BC has been linked to adverse health  
60 effects, especially in urban areas (Lequy et al., 2021; Bouma et al., 2023; Kamińska et al., 2023). Whereas fine particles are best characterized by their mass concentrations (PM<sub>2.5</sub>), the mass of UFP is low compared to that of fine particles. Hence, UFPs are best characterized by their particle number (PN) concentrations (Kwon et al., 2020; Trechera et al., 2023), contributing to about 80-90% of the PN concentrations over urban areas (Dall'Osto et al., 2013; Abbou et al., 2024).

Although modelling is often use to assess the effect of emissions and policies to improve air quality in cities (Mao et al., 2005; Yuan et al., 2014; Kuklinska et al., 2015; Selmi et al., 2016; Andre et al., 2020; Lugon et al., 2022), assessments on BC and UFP concentrations are not frequently evaluated, because they are not regulated, nor measured routinely in cities and difficult to model. Difficulties to model BC are partly linked to differences between elemental carbon and black carbon (Savadkoohi et al., 2023), contributing to large model/measurement discrepancies (Lugon et al., 2021b). However, recommendations for assessing BC concentrations were recently provided by Savadkoohi et al. (2024). The PN concentrations are even more difficult to model,  
70 because of the lack of emission inventories and the rapid transformations of the ultra-fine particles involved (Kukkonen et al., 2016). The difficulties to model BC and PN might also partly be linked to the strong influence of traffic emissions on their concentrations (Andre et al., 2020; Jia et al., 2021; Lugon et al., 2022; Li et al., 2023a; Trechera et al., 2023). Traffic emissions are highly spatially and temporally variable in cities, and their variability is not easily reproduced in emission inventories. Those are usually built using either top-down or bottom-up approaches (Guevara et al., 2016). Bottom-up approaches use detailed  
75 spatial and temporal information for each activity sector, e.g., the number of vehicles for traffic emissions, while top-down approaches use information defined at larger scales (regional or national), which are spatialized using specific data, such as population data. Significant discrepancies may exist between emission inventories using these two approaches (Guevara et al., 2016; Lopez-Aparicio et al., 2017), especially for traffic emissions (Lopez-Aparicio et al., 2017) and non-exhaust emissions from tire, brake and road wear (Piscitello et al., 2021; Tomar et al., 2022). Emission inventories for UFP only exist for top-down  
80 inventories (Kulmala et al., 2011; Zhong et al., 2023). Sartelet et al. (2022) recently provided a methodology to estimate PN emissions from any emission inventories of PM, making it possible to use either bottom-up or top-down emission inventories.

Population exposure to outdoor concentrations at residences is commonly used as a proxy for exposure in epidemiological studies (Hoek et al., 2024), or it is used as an input when estimating multi-environment exposure (Karl et al., 2019; Valari et al., 2020; Elessa Etuman et al., 2024). In epidemiological studies, exposure to outdoor concentrations at residence is often

85 estimated using Land-Use Regression models (Ma et al., 2024), which are usually based on linear regressions using land-use  
predictor variables and data from fixed monitoring stations and passive sampling. Regional-scale models (chemical transport  
models with a spatial resolution often coarser than a few km<sup>2</sup>) are sometimes used (Ostro et al., 2015; Adélaïde et al., 2021),  
leading to simulated fine PM concentrations much lower than those simulated using LUR models (Lequy et al., 2022). Their  
use is limited, because they are not able to represent the urban heterogeneities, e.g. gradients between street and background  
90 concentrations.

Multi-scale models, i.e. a combination of regional and local-scale models (Kwak et al., 2015; Lee and Kwak, 2020; Park  
et al., 2021; Lugon et al., 2022; Lin et al., 2023; Wang et al., 2023b; Strömberg et al., 2023), do represent urban heterogeneities,  
but they are often not able to represent the PM composition and the UFP, or their application is limited to a city district. To  
represent an entire city, chemical-transport models are often coupled with a simple representation of local dispersion (Hood  
95 et al., 2018; Karl et al., 2019; Lugon et al., 2022; Maison et al., 2024) or with subgrid statistical approaches (Valari and Menut,  
2010; Squarcioni et al., 2024). However, only a few studies model BC (Lugon et al., 2021b) and PN (Zhong et al., 2023; Ketznel  
et al., 2021) concentrations down to the street scale. To model PN, the main difficulty lies in the evaluation of atmospheric  
transformations (Kukkonen et al., 2016; Strömberg et al., 2023), and there is to our knowledge no multi-scale model currently  
available to represent PN over a whole city from the urban background down to the street scale taking into account aerosol  
100 dynamics. To simulate gas and particle concentrations over cities from the regional down to the local scale taking into account  
chemistry and aerosol dynamics, the chemical module SSH-aerosol (Sartelet et al., 2020) has been coupled with air quality  
models at the street and regional scales: the street-network Model of Urban Network Intersecting Canyons and Highways  
(MUNICH) (Kim et al., 2018, 2022) and the regional-scale models Polair3D (Lugon et al., 2021a, 2022; Sarica et al., 2023;  
Sartelet et al., 2024) and CHIMERE (Maison et al., 2024; Squarcioni et al., 2024). The coupled multi-scale systems represent  
105 concentrations from the regional down to the street scales, taking into account all emission sources and secondary particle  
formation at all scales consistently (Lugon et al., 2022; Sartelet et al., 2024). Although extensive comparisons to observations  
were performed at the regional and local scales for NO<sub>2</sub>, PM<sub>2.5</sub>, and PM<sub>10</sub> (Sartelet et al., 2018; Lugon et al., 2022; Kim  
et al., 2022; Sarica et al., 2023), urban multi-scale modelling evaluation of BC and PN at both regional and local scales is still  
missing."

110

### *3. Parallel Treatment of PN and Pollutants:*

*Particle number (PN) is a statistical measure, not a pollutant like BC or PM<sub>2.5</sub>. It would be clearer to first discuss pollutant  
concentrations and then evaluate particle characteristics through PN. Avoid listing PN alongside BC and PM<sub>2.5</sub> in a parallel  
manner in the title and main text.*

115

**Our reply:** PN is not a statistical measure, it corresponds to the particle number concentrations. It is a metric used to  
represent particles (Kwon et al., 2020; WHO, 2021), similarly to PM<sub>2.5</sub>. PM<sub>2.5</sub> represents the mass of particles of diameter  
lower than 2.5 μm, and PN represents the number of particles. PM<sub>2.5</sub> is mostly influenced by fine particles of diameters in the

range 0.1 to 2.5  $\mu\text{m}$ , whereas PN is mostly influenced by ultra-fine particles, of diameters lower than 0.1  $\mu\text{m}$ . Hence, for clarity,  
120 the title was modified to "Population exposure to outdoor  $\text{NO}_2$ , black carbon, ultra-fine and fine particles".

#### 4. Excessive Abbreviations:

*The use of abbreviations is sometimes excessive, making the text difficult to follow. For instance, in Line 44, the abbreviation "PN" is introduced without proper context. It is recommended to reduce the use of abbreviations, particularly for terms like*  
125 *"particle number," to improve readability.*

**Our reply:** The abbreviation for PN is commonly used in the literature, and now properly introduced in the introduction. In this paper, the abbreviation "PN" is consistently used throughout the discussion of the paper's results. To improve readability, a table summarizing the different abbreviations was added at the beginning of section 2.

**Table 1.** List of abbreviations

| Nomenclature |                                   |
|--------------|-----------------------------------|
| BC           | Black carbon                      |
| eBC          | Equivalent Black Carbon           |
| PN           | Particle number                   |
| LUR          | Land-Use Regression               |
| CTM          | Chemical transport model          |
| UFP          | Ultra-fine particles              |
| REF          | Reference simulation              |
| SEN          | Sensitivity simulation            |
| PWC          | Population Weighted Concentration |
| ESF          | Exposure Scaling Factor           |

130

#### 5. Clarification on PN and Ultra-fine Particles:

*The introduction mentions that ultrafine particles are best characterized by PN concentrations. If PN is being used in this study to represent ultrafine particles, ensure this connection is well-supported in the text. If the simulation does not focus on ultrafine particles, it would be better not to mention them, as they are challenging to model accurately.*

135

**Our reply:** One main focus of this study is the modelling of ultra-fine particles, which are characterized by their number concentrations, because their mass is low but their number is high, as detailed in the reply number 3 to the reviewer's comments. The introduction has been rewritten to better explain this point: "Whereas fine particles are best characterized by their mass concentrations, the mass of UFP is low compared to that of fine particles. Hence, UFPs are best characterized by their particle  
140 number (PN) concentrations (Kwon et al., 2020; Trechera et al., 2023), contributing to about 80-90% of the PN concentrations

over urban areas (Dall'Osto et al., 2013; Abbou et al., 2024)." Furthermore, the title has been changed to bring up the terms fine and ultra-fine particles.

*6. Model Setup and Emissions Summary:*

145 *The description of the model setup and emissions data in Section 2 is too detailed and could be streamlined. Consider summarizing the key aspects in a table and moving the detailed descriptions to the supplementary information (SI) for clarity.*

**Our reply:** The details about the speciation of traffic and non-traffic emissions were put in the Appendix B. To improve clarity, the order of the sections was modified, with the section on the "Sensitivity to non-exhaust emissions" presented after  
150 the section on "PN emissions". As suggested by reviewer 2, the description of the calculation of exposure was added to the "Material and methods" section.

*7. Quantitative Differences in Section 3.3:*

155 *Instead of using qualitative terms like "higher" or "lower" in Section 3.3, it would be more informative to present the quantitative differences between the results to enhance the clarity of the comparisons.*

**Our reply:** We have added the quantitative difference in section 3.3.

Now, it reads: "The impacts of the emission inventory are investigated over Greater Paris. In the EMEP simulation, the NO<sub>2</sub> concentrations are lower by about 15% along the roads and airport than those in the REF simulation, due to higher traffic  
160 emissions using the bottom-up inventory than the EMEP one (Figure C5). In contrast, NO<sub>2</sub> concentrations in areas excluding roads are higher, by about 16%, in the EMEP simulation. The concentrations of NO<sub>2</sub>, eBC, PM<sub>2.5</sub>, and PN in the EMEP simulation are 12%, 50%, 7%, 38% lower, respectively, for Paris compared to those in the REF simulation. The differences in the spatial distributions of eBC and PM<sub>2.5</sub> concentrations are similar to those of NO<sub>2</sub> concentrations, but the spatial differences are less pronounced than for NO<sub>2</sub>. In the eastern region of Greater Paris and the extreme northwest part of the region, PN  
165 concentrations are lower using EMEP than the bottom-up inventory owing to lower emissions compared to other areas within the region."

*8. Applicability to Other Cities:*

170 *This study focuses on street-level traffic emissions and population distribution in the Greater Paris region. It would be beneficial to discuss whether the findings and conclusions could be extended to other large cities, particularly those with different urban structures or traffic patterns.*

**Our reply:** As the reviewer mentioned, while this study provides insights into street-level traffic emissions and population exposure specific to Greater Paris, its methodologies and findings could be adapted to other major cities by reflecting the  
175 different urban structures and regular conditions. We have added the following sentences in the conclusion part:

“Multi-scale simulations using bottom-up traffic emissions provide innovative and detailed spatially-resolved air-quality information in urban areas. In particular, the ESF may be used to refine the evaluation of population exposure in urban areas employing regional-scale models. The methodologies and findings could be adapted to other major cities, with detailed street-scale emission inventory and street characteristics. This could be done for example, by the continuation of the modelling with the MUNICH model in several cities (Sarica et al., 2023; Wang et al., 2023a; Cevolani et al., 2024). Further investigation is also needed to assess the concentrations and population exposure scaling factors for different seasons.”

### Minor Comments:

*1.Line 19: Clarify what is meant by "regional scale"—what specific area or distance does this term represent?*

185

**Our reply:** This is now clarified in the introduction: " Regional-scale models (chemical transport models with a spatial resolution often coarser than a few km<sup>2</sup>)"

*2.Line 33: Reword the sentence to clarify that not all particle compounds impact health equally.*

190

**Our reply:** We have modified the sentences to clarity.

Now, it reads : “Although a large part of the health impacts are attributed to particles (Southerland et al., 2022), the health effects associated with different particle compounds and different particle size can vary considerably (Park et al., 2018; WHO, 2021; Haddad et al., 2024).”

195

*3.Line 34: The term "large health effect" is vague; it would be more effective to provide specific examples or references.*

**Our reply:** We agree that the term 'large health effects' is vague. To enhance clarity, we modified the sentence to specify the health impacts of BC and ultra-fine particles.

200

Now, it reads: “In particular, black carbon (BC) and ultra-fine particles (diameter lower than 0.1 μm) are considered "priority" emerging pollutants (WHO, 2021; Goobie et al., 2024), as stated in the European air-quality directives promulgated in October 2024. Long-term exposure to ultra-fine particles is associated with increased mortality (Li et al., 2023b), while BC has been linked to adverse health effects, especially in urban areas (Lequy et al., 2021; Bouma et al., 2023; Kamińska et al., 2023).”

205

*4. Line 36: Include a reference or example of the ratio of ultrafine particles in terms of number concentration, such as "XX% of total number concentration is from ultrafine particles."*

**Our reply:** The following sentence was added in the introduction "UFPs are best characterized by their particle number (PN) concentrations (Kwon et al., 2020; Trechera et al., 2023), contributing to about 80-90% of the PN concentrations over urban areas (Dall'Osto et al., 2013; Abbou et al., 2024)."

5. Line 44: *I don't think influences of traffic on BC is rare.* <https://www.sciencedirect.com/science/article/pii/S0269749121014500>  
<https://acp.copernicus.org/articles/23/6545/2023/acp-23-6545-2023.pdf>

**Our reply:** The term 'rare' in the sentence means that research on BC remains much less extensive compared to gaseous pollutants and PM. The references you provided were also published recently, and we added them to the paper in the illustration of the influence of traffic on BC and PN. The sentence has been modified to "Although modelling is often use to assess the effect of emissions and policies to improve air quality in cities (Mao et al., 2005; Yuan et al., 2014; Kuklinska et al., 2015; Selmi et al., 2016; Andre et al., 2020; Lugon et al., 2022), assessment on BC and UFP concentrations are not frequently evaluated, because they are not regulated, not measured routinely in cities and difficult to model. "

6. Lines 46-53: *The paragraph discussing BC estimation and adjustment methods should be moved to the Methods section for better flow.*

**Our reply:** We have moved the paragraph on the harmonization factor to Section 2 under Measurements, to improve the flow and organization of the manuscript.

7. Line 111: *Spell out the full name of "SSH-aerosol" and clarify its role in the study. Similarly, "CAMS" at Line 118 should be defined.*

**Our reply:** The SSH-aerosol model integrates three modules: SCRAM (Size-Composition Resolved Aerosol Model), which addresses the dynamic evolution of aerosols; SOAP (Secondary Organic Aerosol Processor) for gas/particle partitioning of organic compounds; and H<sup>2</sup>O (Hydrophobic/Hydrophilic Organics) focusing on the formation of condensable organic compounds. Additionally, CAMS stands for the Copernicus Atmosphere Monitoring Service. We have clarified these terms for better understanding.

Now, it reads : "The chemical scheme used is MELCHIOR2 modified to represent the formation of organic condensables as described in SSH-aerosol (Sartelet et al., 2020), which is used for aerosol dynamics (coagulation and condensation/evaporation). The SSH-aerosol model integrates three modules: SCRAM (Size-Composition Resolved Aerosol Model), which addresses the dynamic evolution of aerosols; SOAP (Secondary Organic Aerosol Processor) for gas/particle partitioning of organic compounds; and H<sup>2</sup>O (Hydrophobic/Hydrophilic Organics) for the formation of condensable organic compounds."



8. Figure 3: To better highlight the changes in NO<sub>2</sub> and BC, consider normalizing the data to make the differences clearer.

**Our reply:** The normalized data would not significantly change the observed emission patterns between weekdays and weekends. Moreover, normalized emissions may not effectively represent the quantitative differences in emissions between NO<sub>2</sub> and BC or between stations. Therefore, we have decided to keep the original figure in  $\mu\text{g m}^{-2} \text{s}^{-1}$ .

\* normalized emissions = emissions / average emissions

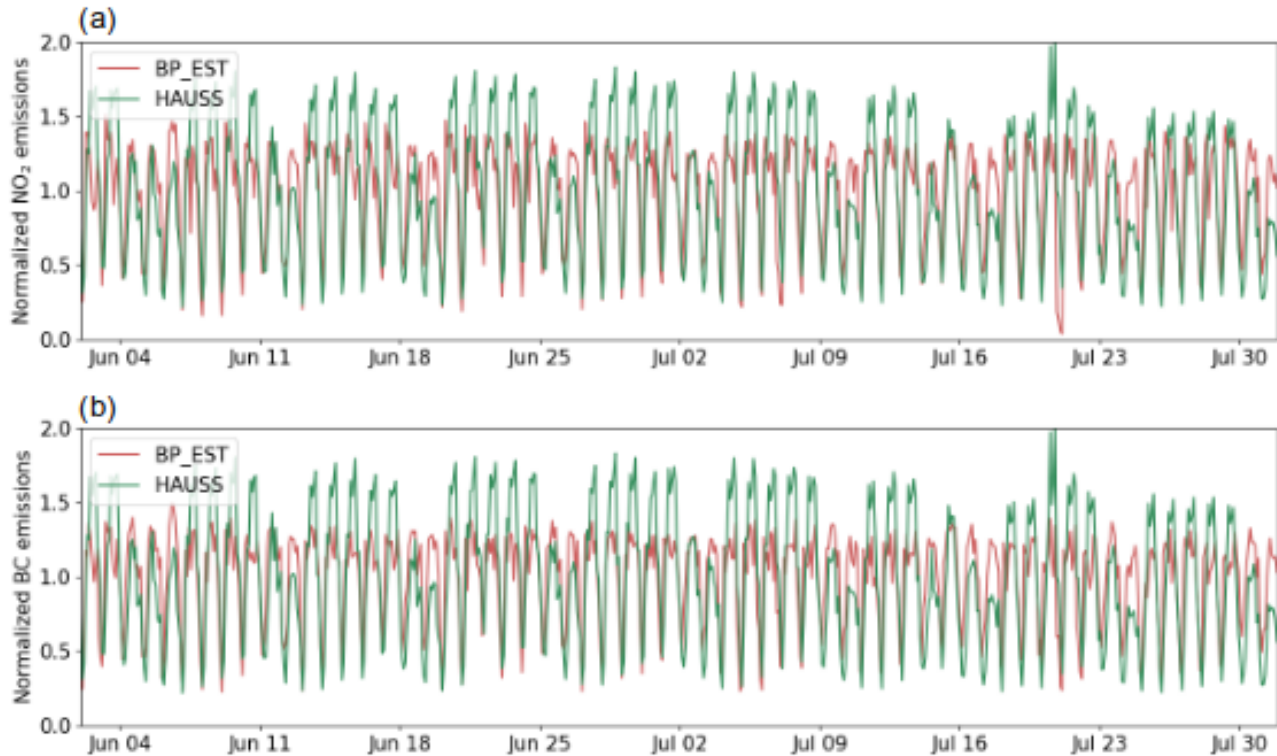

**Figure 1.** Time series for the normalized (a) NO<sub>2</sub> and (b) BC emissions at the HAUSS (city center) and BP\_EST (heavy-traffic) stations

9. Line 113: Specify whether the WRF-CHIMERE/MUNICH coupling is online or offline.

250

**Our reply:** We already specify in the model description the coupling between CHIMERE and MUNICH: "The WRF-CHIMERE/SSH-aerosol model is one-way coupled to the street-network model MUNICH". We added details about the coupling between WRF and CHIMERE: "The CHIMERE model is coupled with the meteorological model Weather and Research Forecasting (WRF) (Powers et al., 2017), which was used to compute the meteorological fields needed in the simulation. Here, no feedback interactions are considered between concentrations and meteorological fields, with a one-way coupling approach."

255

*10. Line 254: The formula presented here should be centered and numbered for clarity and consistency.*

**Our reply:** We ensured the formula are centered and properly numbered for clarity and consistency in the revised manuscript.

## 260 References

- Abbou, G., Ghersi, V., Gaie-Levrel, F., Kauffmann, A., Reynaud, M., Debert, C., Quénel, P., and Baudic, A.: Ultrafine Particles Monitoring in Paris: From Total Number Concentrations to Size Distributions Measurements, *Aer. Air. Qual. Res.*, 24, 240093, <https://doi.org/10.4209/aaqr.240093>, 2024.
- Adélaïde, L., Medina, S., Wagner, V., de Crouy-Chanel, P., Real, E., Colette, A., Couvidat, F., Bessagnet, B., Alter, M., Durou, A., Host, S., Hulin, M., Corso, M., and Pascal, M.: Covid-19 lockdown in spring 2020 in France provided unexpected opportunity to assess health impacts of falls in air pollution, *Front. Sustain. Cities*, 3, 643 821, <https://doi.org/10.3389/frsc.2021.643821>, 2021.
- Andre, M., Sartelet, K., Moukhtar, S., Andre, J., , and Redaelli, M.: Diesel, petrol or electric vehicles: What choices to improve urban air quality in the Ile-de-France region? A simulation platform and case study, *Atmos. Environ.*, 241, 117752, <https://doi.org/10.1016/j.atmosenv.2020.117752>, 2020.
- 270 Bouma, F., Janssen, N. A., Wesseling, J., van Ratingen, S., Strak, M., Kerckhoffs, J., Gehring, U., Hendricx, W., de Hoogh, K., Vermeulen, R., and Hoek, G.: Long-term exposure to ultrafine particles and natural and cause-specific mortality, *Environ. Int.*, 175, 107960, <https://doi.org/10.1016/j.envint.2023.107960>, 2023.
- Cevolani, K. T., Lugon, L., Goulart, E. V., and Santos, J. M.: Influence of distinct mobility scenarios on NO<sub>2</sub>, PM<sub>2.5</sub> and PM<sub>10</sub> street-level concentrations. A case study in a Brazilian urban neighborhood, 15, 102 126, <https://doi.org/10.1016/j.apr.2024.102126>, 2024.
- 275 Dall’Osto, M., Querol, X., Alastuey, A., O’Dowd, C., Harrison, R. M., Wenger, J., and Gómez-Moreno, F. J.: On the spatial distribution and evolution of ultrafine particles in Barcelona, *Atmos. Chem. Phys.*, 13, 741–759, <https://doi.org/10.5194/acp-13-741-2013>, 2013.
- Elessa Etuman, A., Coll, I., Vigiú, V., Coulombel, N., and Gallez, C.: Exploring urban planning as a lever for emission and exposure control: Analysis of master plan actions over greater Paris, *Atmos. Environ.: X*, 22, 100 250, <https://doi.org/10.1016/j.aeaoa.2024.100250>, 2024.
- Fu, X., Xiang, S., Liu, J., Yu, J., Mauzerall, D., and Tao, S.: High-resolution simulation of local traffic-related NO<sub>x</sub> dispersion and distribution in a complex urban terrain, *Environ. Pollut.*, 263, 114 390, <https://doi.org/10.1016/j.envpol.2020.114390>, 2020.
- 280 Goobie, G., Saha, P., Carlsten, C., Gibson, K., Johannson, K., Kass, D., Ryerson, C., Zhang, Y., Robinson, A., Presto, A., and Nourai, S.: Ambient ultrafine particulate matter and clinical outcomes in fibrotic interstitial lung disease, *Am. J. Respir. Crit. Care Med.*, 209, 1082–1090, <https://doi.org/10.1164/rccm.202307-1275OC>, 2024.
- Guevara, M., Lopez-Aparicio, S., Cuvelier, C., Tarrason, L., Clappier, A., and Thunis, P.: A benchmarking tool to screen and compare bottom-up and top-down atmospheric emission inventories, *Air. Qual. Atmos. Health*, 10, 627–642, <https://doi.org/10.1007/s11869-016-0456-6>, 2016.
- Haddad, I., Vienneau, D., Daellenbach, K., Modini, R., Slowik, J., Upadhyay, A., Vasilakos, P.N. a Bell, D., Hoogh, K., and Prevot, A.: Opinion: How will advances in aerosol science inform our understanding of the health impacts of outdoor particulate pollution?, *Atmos. Chem. Phys.*, 24, <https://doi.org/10.5194/acp-24-11981-2024>, 2024.
- 290 Hoek, G., Vienneau, D., and Hoogh, K.: Does residential address-based exposure assessment for outdoor air pollution lead to bias in epidemiological studies?, *Environ. Health*, 23:75, <https://doi.org/10.1186/s12940-024-01111-0>, 2024.
- Holnicki, P., Nahorski, Z., and Kaluszko, A.: Impact of vehicle fleet modernization on the traffic-originated air pollution in an urban area—a case study, *Atmosphere*, 12, 1581, <https://doi.org/10.3390/atmos12121581>, 2021.
- Hood, C., MacKenzie, I., Stocker, J., Johnson, K., Carruthers, D., Vieno, M., and Doherty, R.: Air quality simulations for London using a coupled regional-to-local modelling system, *Atmos. Chem. Phys.*, 18, 11 221–11 245, <https://doi.org/10.5194/acp-18-11221-2018>, 2018.
- 295

- Jereb, B., Gajšek, B., Šipek, G., Kovše, , and Obrecht, M.: Traffic density-related black carbon distribution: Impact of wind in a Basin town, *Int. J. Env. Res. Pub. Health*, 18, 6490, <https://doi.org/10.3390/ijerph18126490>, 2021.
- Jia, H., Pan, J., Huo, J., Fu, Q., Duan, Y., Lin, Y., Hu, X., and Cheng, J.: Atmospheric black carbon in urban and traffic areas in Shanghai: Temporal variations, source characteristics, and population exposure, *Environ. Pollut*, 289, 117 868, <https://doi.org/10.1016/j.envpol.2021.117868>, 2021.
- 300 Kamińska, J., Turek, T., Van Popple, M., Peters, J., Hofman, J., and Kazak, J.: Whether cycling around the city is in fact healthy in the light of air quality – Results of black carbon, *J. Environ. Manage.*, 337, <https://doi.org/10.1016/j.jenvman.2023.117694>, 2023.
- Karl, M., Walker, S.-E., Solberg, S., and Ramacher, M. O. P.: The Eulerian urban dispersion model EPISODE – Part 2: Extensions to the source dispersion and photochemistry for EPISODE–CityChem v1.2 and its application to the city of Hamburg, *Geosci. Model Dev.*, 12, 3357–3399, <https://doi.org/10.5194/gmd-12-3357-2019>, 2019.
- 305 Ketznel, M., Frohn, L., Christensen, J. H., Brandt, J., Massling, A., Andersen, C., Im, U., Jensen, S. S., Khan, J., Nielsen, O.-K., Plejdrup, M. S., Manders, A., Denier van der Gon, H., Kumar, P., and Raaschou-Nielsen, O.: Modelling ultrafine particle number concentrations at address resolution in Denmark from 1979 to 2018 - Part 2: Local and street scale modelling and evaluation, *Atmos. Environ.*, 264, 118 633, <https://doi.org/10.1016/j.atmosenv.2021.118633>, 2021.
- 310 Kim, Y., Wu, Y., Seigneur, C., and Roustan, Y.: Multi-scale modeling of urban air pollution: development and application of a Street-in-Grid model (v1.0) by coupling MUNICH (v1.0) and Polair3D (v1.8.1), *Geosci. Model Dev.*, 11, 611–629, <https://doi.org/10.5194/gmd-11-611-2018>, 2018.
- Kim, Y., Lugonl, L., Maison, A., Sarica, T., Roustan, Y., Valari, M., Zhang, Y., André, M., and Sartelet, K.: MUNICH v2.0: a street-network model coupled with SSH-aerosol (v1.2) for multi-pollutant modelling, *Geosci. Model Dev.*, 15, 7371–7396, <https://doi.org/10.5194/gmd-15-7371-2022>, 2022.
- 315 Kukkonen, J., Karl, M., Keuken, M. P., Denier van der Gon, H. A. C., Denby, B. R., Singh, V., Douros, J., Manders, A., Samaras, Z., Moussiopoulos, N., Jonkers, S., Aarnio, M., Karppinen, A., Kangas, L., Lützenkirchen, S., Petäjä, T., Vouitsis, I., and Sokhi, R. S.: Modelling the dispersion of particle numbers in five European cities, *Geosci. Model Dev.*, 9, 451–478, <https://doi.org/10.5194/gmd-9-451-2016>, 2016.
- 320 Kuklinska, K., Wolska, L., and Namiesnik, J.: Air quality policy in the U.S. and the EU and – a review, 2015.
- Kulmala, M., Asmi, A., Lappalainen, H., Baltensperger, U., Brenguier, J.-L., Facchini, M., Hansson, H.-C., Hov, o., O’Dowd, C., Pöschl, U., Wiedensohler, A., Boers, R., Boucher, O., de Leeuw, G., Denier van der Gon, H., Feichter, J., Krejci, R., Laj, P., Lihavainen, H., Lohmann, U., McFiggans, G., Mentel, T., Pilinis, C., Riipinen, I., Schulz, M., Stohl, A., Swietlicki, E., Vignati, E., Alves, C., Amann, M., Ammann, M., Arabas, S., Artaxo, P., Baars, H., Beddows, D., Bergström, R., Beukes, J., Bilde, M., Burkhardt, J., Canonaco, F., Clegg, S., Coe, H., Crumeyrolle, S., D’Anna, B., Decesari, S., Gilardoni, S., Fischer, M., Fjaeraa, A., Fountoukis, C., George, C., Gomes, L., Halloran, P., Hamburger, T., Harrison, R., Herrmann, H., Hoffmann, T., Hoose, C., Hu, M., Hyvärinen, A., Hörrak, U., Iinuma, Y., Iversen, T., Josipovic, M., Kanakidou, M., Kiendler-Scharr, A., Kirkevåg, A., Kiss, G., Klimont, Z., Kolmonen, P., Komppula, M., Kristjánsson, J.-E., Laakso, L., Laaksonen, A., Labonnote, L., Lanz, V., Lehtinen, K., Rizzo, L., Makkonen, R., Manninen, H., McMeeking, G., Merikanto, J., Minikin, A., Mirme, S., Morgan, W., Nemitz, E., O’Donnell, D., Panwar, T. S., Pawlowska, H., Petzold, A., Pienaar, J., Pio, C., Plass-Duelmer, C., Prévôt, A., Pryor, S., Reddington, C., Roberts, G., Rosenfeld, D., Schwarz, J., Seland, o., Sellegri, K., Shen, X., Shiraiwa, M., Siebert, H., Sierau, B., Simpson, D., Sun, J., Topping, D., Tunved, P., Vaattovaara, P., Vakkari, V., Veefkind, J., Visschedijk, A., Vuollekoski, H., Vuolo, R., Wehner, B., Wildt, J., Woodward, S., Worsnop, D., van Zadelhoff, G.-J., Zardini, A., Zhang, K., van Zyl, P., Kerminen, V.-M., Carslaw, K., and Pandis, S.: General overview: European Integrated project on Aerosol Cloud Climate and Air Quality interactions (EUCAARI) –
- 330

- integrating aerosol research from nano to global scales, *Atmos. Chem. Phys.*, 11, 13 061–13 143, [https://doi.org/10.5194/acp-11-13061-](https://doi.org/10.5194/acp-11-13061-2011)  
335 2011, 2011.
- Kwak, K.-H., Baik, J.-J., Ryu, Y.-H., and Lee, S.-H.: Urban air quality simulation in a high-rise building area using a CFD model coupled with mesoscale meteorological and chemistry-transport models, *Atmos. Environ.*, 100, 167–177, <https://doi.org/10.1016/j.atmosenv.2014.10.059>, 2015.
- Kwon, H., Ryu, M., and Carlsten, C.: Ultrafine particles: unique physicochemical properties relevant to health and disease, *Exp Mol Med.*,  
340 52, 318–328, <https://doi.org/10.1038/s12276-020-0405-1>, 2020.
- Lee, S.-H. and Kwak, K.-H.: Assessing 3-D spatial extent of near-road air pollution around a signalized intersection using drone monitoring and WRF-CFD modeling, *Int. J. Env. Res. Pub. Health*, 17, 6915, <https://doi.org/10.3390/ijerph17186915>, 2020.
- Lequy, E., Siemiatycki, J., Hoogh, K., Vienneau, D., Dupuy, J., Garès, V., Hertel, O., Christensen, J., Zhivin, S., Goldberg, M., Zins, M., ,  
and Jacquemin, B.: Contribution of long-term exposure to outdoor black carbon to the carcinogenicity of air pollution: Evidence regarding  
345 risk of cancer in the Gazel Cohort, *Environ. Health Perspect.*, 2021.
- Lequy, E., Zare Sakhvidi, M. J., Vienneau, D., de Hoogh, K., Chen, J., Dupuy, J.-F., Garès, V., Burte, E., Bouaziz, O., Le Tertre, A., Wagner, V., Hertel, O., Christensen, J. H., Zhivin, S., Siemiatycki, J., Goldberg, M., Zins, M., and Jacquemin, B.: Influence of exposure assessment methods on associations between long-term exposure to outdoor fine particulate matter and risk of cancer in the French cohort Gazel, *Sci. Total Environ.*, 820, 153 098, <https://doi.org/10.1016/j.scitotenv.2022.153098>, 2022.
- 350 Li, F., Luo, B., Zhai, M., Liu, L., Zhao, G., Xu, H., Deng, T., Deng, X., Tan, H., Kuang, Y., and Zhao, J.: Black carbon content of traffic emissions significantly impacts black carbon mass size distributions and mixing states, *Atmos. Chem. Phys.*, 23, 6545–6558, <https://doi.org/10.5194/acp-23-6545-2023>, 2023a.
- Li, G., Lu, P., Deng, S., Gao, J., Lu, Z., and Li, Q.: Spatial variability and health assessment of particle number concentration at different exposure locations near urban traffic arterial: A case study in Xi'an, China, *Atmos. Environ.*, 314,  
355 <https://doi.org/10.1016/j.atmosenv.2023.120086>, 2023b.
- Lin, C., Wang, Y., Ooka, R., Flageul, C., Kim, Y., Kikumoto, H., Wang, Z., and Sartelet, K.: Modeling of street-scale pollutant dispersion by coupled simulation of chemical reaction, aerosol dynamics, and CFD, *Atmos. Chem. Phys.*, 23, 1421–1436, <https://doi.org/10.5194/acp-23-1421-2023>, 2023.
- Lopez-Aparicio, S., Guevara, M., Thunis, P., and Cuvelier, K.: Assessment of discrepancies between bottom-up and regional emission  
360 inventories in Norwegian urban areas, *Atmos. Environ.*, 154, 285–296, <https://doi.org/10.1016/j.atmosenv.2017.02.004>, 2017.
- Lugon, L., Sartelet, K., Kim, Y., Vigneron, J., and Chrétien, O.: Simulation of primary and secondary particles in the streets of Paris using MUNICH, *Faraday Discuss.*, 226, 432–456, <https://doi.org/10.1039/D0FD00092B>, 2021a.
- Lugon, L., Vigneron, J., Debert, C., Chrétien, O., and Sartelet, K.: Black carbon modeling in urban areas: investigating the influence of resuspension and non-exhaust emissions in streets using the Street-in-Grid model for inert particles (SinG-inert), *Geosci. Model Dev.*, 14,  
365 7001–7019, <https://doi.org/10.5194/gmd-14-7001-2021>, 2021b.
- Lugon, L., Kim, Y., Vigneron, J., Chrétien, O., André, M., André, J., Moukhtar, S., Redaelli, M., and Sartelet, K.: Effect of vehicle fleet composition and mobility on outdoor population exposure: A street resolution analysis in Paris, *Atmos. Pollut. Res.*, 13, 101 365, <https://doi.org/10.1016/j.apr.2022.101365>, 2022.
- Ma, X., Zou, B., Deng, J., Gao, J., Longley, I., Xiao, S., Guo, B., Wu, Y., Xu, T., Xu, X., Yang, X., Wang, X., Tan, Z., Wang, Y., Morawska, L.,  
370 and Salmond, J.: A comprehensive review of the development of land use regression approaches for modeling spatiotemporal variations of ambient air pollution: A perspective from 2011 to 2023, *Environ. Int.*, 183, 108 430, <https://doi.org/10.1016/j.envint.2024.108430>, 2024.

- Maison, A., Lugon, L., Park, S.-J., Boissard, C., Faucheux, A., Gros, V., Kalalian, C., Kim, Y., Leymarie, J., Petit, J.-E., Roustan, Y., Sanchez, O., Squarcioni, A., Valari, M., Viatte, C., Vigneron, J., Tuzet, A., and Sartelet, K.: Contrasting effects of urban trees on air quality: From the aerodynamic effects in streets to impacts of biogenic emissions in cities, *Sci. Total Environ.*, 946, 174 116, 375 <https://doi.org/10.1016/j.scitotenv.2024.174116>, 2024.
- Mao, X., Guo, X., Chang, Y., and Peng, Y.: Improving air quality in large cities by substituting natural gas for coal in China: changing idea and incentive policy implications, *Energy Policy*, 33, 307–318, <https://doi.org/10.1016/j.enpol.2003.08.002>, 2005.
- Ostro, B., Hu, J., Goldberg, D., Reynolds, P., Hertz, A., Bernstein, L., and Kleeman, M.: Associations of mortality with long-term exposures to fine and ultrafine particles, species and sources: results from the California Teachers Study Cohort, *Environ Health Perspect.*, 123, 380 549–556, <https://doi.org/10.1289/ehp.1408565>, 2015.
- Park, M., Joo, H., Lee, K., Jang, M., Kim, S., Kim, I., Borlaza, L., Lim, H., Shin, H., Chung, K., Choi, Y.-H., Park, S., Bae, M.-S., Lee, J., Song, H., and Park, K.: Differential toxicities of fine particulate matters from various sources, *Sci. Rep.*, 8, 17 007, <https://doi.org/10.1038/s41598-018-35398-0>, 2018.
- Park, S.-J., Kang, G., Choi, W., Kim, D.-Y., Kim, J.-S., and J.-J., K.: Effects of fences and green zones on the air flow and PM<sub>2.5</sub> concentration around a school in a building-congested district, *Applied Sciences*, 11, 9216, <https://doi.org/10.3390/app11199216>, 2021.
- Piscitello, A., Bianco, C., Casasso, A., and Sethi, R.: Non-exhaust traffic emissions: Sources, characterization, and mitigation measures, *Sci. Total Environ.*, 766, 144 440, <https://doi.org/10.1016/j.scitotenv.2020.144440>, 2021.
- Powers, J. G., Klemp, J. B., Skamarock, W. C., Davis, C. A., Dudhia, J., Gill, D. O., Coen, J. L., Gochis, D. J., Ahmadov, R., Peckham, S. E., et al.: The Weather Research and Forecasting model: Overview, system efforts, and future directions, *Bull. Amer. Meteor. Soc.*, 98, 390 1717–1737, 2017.
- Sarica, T., Sartelet, K., Roustan, Y., Kim, Y., Lugon, L., Marques, B., D’Anna, B., Chaillou, C., and Larrieu, C.: Sensitivity of pollutant concentrations in urban streets to asphalt and traffic-related emissions, *Environ. Pollut.*, 332, 121 955, <https://doi.org/10.1016/j.envpol.2023.121955>, 2023.
- Sartelet, K., Zhu, S., Moukhtar, S., André, M., André, J., Gros, V., Favez, O., Brasseur, A., and Redaelli, M.: Emission of intermediate, semi 395 and low volatile organic compounds from traffic and their impact on secondary organic aerosol concentrations over Greater Paris, *Atmos. Environ.*, 180, 126–137, 2018.
- Sartelet, K., Couvidat, F., Wang, Z., Flageul, C., and Kim, Y.: SSH-Aerosol v1.1: A modular box model to simulate the evolution of primary and secondary aerosols, *Atmosphere*, 11, 525, <https://doi.org/10.3390/atmos11050525>, 2020.
- Sartelet, K., Kim, Y., Couvidat, F., Merkel, M., Petäjä, T., Sciare, T., and Wiedensohler, A.: Influence of emission size distribution and 400 nucleation on number concentrations over Greater Paris, *Atmos. Chem. Phys.*, 22, 8579–8596, <https://doi.org/10.5194/acp-22-8579-2022>, 2022.
- Sartelet, K., Wang, Z., Lannuque, V., Iyer, S., Couvidat, F., and Sarica, T.: Modelling molecular composition of SOA from toluene photo-oxidation at urban and street scales, *Environ. Sci.: Atmos.*, 4, 839–847, <https://doi.org/10.1039/D4EA00049H>, 2024.
- Savadkoobi, M., Pandolfi, M., Reche, C., Niemi, J., Mooibroek, D., Titos, G., Green, D., Tremper, A., Hueglin, C., Liakakou, E., Mi- 405 halopoulos, N., Stavroulas, I., Artiñano, B., Coz, E., Alados-Arboledas, L., Beddows, D., Riffault, V., Brito, J., Bastian, S., Baudic, A., Colombi, C., Costabile, F., Chazeau, B., Marchand, N., Gómez-Amo, J., Estellés, V., Matos, V., Gaag, E., Gille, G., Luoma, K., Manninen, H., Norman, M., Silvergren, S., Petit, J., Putaud, J., Rattigan, O., Timonen, H., Tuch, T., Merkel, M., Weinhold, K., Vratolis, S., Vasilescu, J., Favez, O., Harrison, R., Laj, P., Wiedensohler, A., Hopke, P., Petäjä, T., Alastuey, A., and Querol, X.: The variability

- of mass concentrations and source apportionment analysis of equivalent black carbon across urban Europe, *Environ. Int.*, 178, 108 081, <https://doi.org/10.1016/j.envint.2023.108081>, 2023.
- 410 Savadkoochi, M., Pandolfi, M., Favez, O., Putaud, J.-P., Eleftheriadis, K., Fiebig, M., Hopke, P., Laj, P., Wiedensohler, A., Alados-Arboledas, L., Bastian, S., Chazeau, B., María, , Colombi, C., Costabile, F., Green, D., Hueglin, C., Liakakou, E., Luoma, K., Listrani, S., Mihalopoulos, E., Marchand, E., Močnik, G., Niemi, J., Ondráček, J., Petit, J.-E., Rattigan, O., Reche, C., Timonen, H., Titos, G., Tremper, A., Vratolis, S., Vodička, P., Funes, E., Zíková, N., Harrison, R., Petäjä, T., Alastuey, A., and Querol, X.: Recommendations for reporting equivalent black carbon (eBC) mass concentrations based on long-term pan-European in-situ observations, *Environ. Int.*, 185, 108 553, <https://doi.org/10.1016/j.envint.2024.108553>, 2024.
- Selmi, W., Weber, C., Rivière, E., Blond, N., Mehdi, L., and Nowak, D.: Air pollution removal by trees in public green spaces in Strasbourg city, France, *Urban For. Urban Green*, 17, 192–201, <https://doi.org/10.1016/j.ufug.2016.04.010>, 2016.
- Southerland, V., Brauer, M., Moheg, A., Hammer, M., van Donkelaar, A., Martin, R., Apte, J., and Anenberg, S.: Global urban temporal trends in fine particulate matter (PM<sub>2.5</sub>) and attributable health burdens: estimates from global datasets, *Lancet Planet Health*, 6, 139–146, [https://doi.org/10.1016/S2542-5196\(21\)00350-8](https://doi.org/10.1016/S2542-5196(21)00350-8), 2022.
- 420 Squarcioni, A., Roustan, Y., Valari, M., Kim, Y., Sartelet, K., Lugon, L., Dugay, F., and Voitot, R.: To what extent is the description of streets important in estimating local air-quality? A case study over Paris, *EGUsphere*, 2024, 1–43, <https://doi.org/10.5194/egusphere-2024-1043>, 2024.
- 425 Strömberg, J., Li, X., Kurppa, M., Kuuluvainen, H., Pirjola, L., and Järvi, L.: Effect of radiation interaction and aerosol processes on ventilation and aerosol concentrations in a real urban neighbourhood in Helsinki, *Atmos. Chem. Phys.*, 23, 9347–9364, <https://doi.org/10.5194/acp-23-9347-2023>, 2023.
- Tomar, G., Nagpure, A., Kumar, V., and Jain, Y.: High resolution vehicular exhaust and non-exhaust emission analysis of urban-rural district of India, *Sci. Total Environ.*, 805, 150 255, <https://doi.org/10.1016/j.scitotenv.2021.150255>, 2022.
- 430 Trechera, P., Garcia-Marlès, M., Liu, X., Reche, C., Pérez, N., Savadkoochi, M., Beddows, D., Salma, I., Vorosmarty, M., Casans, A., Casquero-Vera, J. A., Hueglin, C., Marchand, N., Chazeau, B., Gille, G., Kalkavouras, P., Mihalopoulos, N., Ondracek, J., Zikova, N., Niemi, J. V., Manninen, H. E., Green, D. C., Tremper, A. H., Norman, M., Vratolis, S., Eleftheriadis, K., Gomez-Moreno, F. J., Alonso-Blanco, E., Gerwig, H., Wiedensohler, A., Weinhold, K., Merkel, M., Bastian, S., Petit, J.-E., Favez, O., Crumeyrolle, S., Ferlay, N., Martins Dos Santos, S., Putaud, J.-P., Timonen, H., Lampilahti, J., Asbach, C., Wolf, C., Kaminski, H., Altug, H., Hoffmann, B., Rich, D. Q., Pandolfi, M., Harrison, R. M., Hopke, P. K., Petäjä, T., Alastuey, A., and Querol, X.: Phenomenology of ultrafine particle concentrations and size distribution across urban Europe, *Environ. Int.*, 172, 107 744, <https://doi.org/10.1016/j.envint.2023.107744>, 2023.
- 435 Valari, M. and Menut, L.: Transferring the heterogeneity of surface emissions to variability in pollutant concentrations over urban areas through a chemistry-transport model, *Atmos. Environ.*, 44, 3229–3238, <https://doi.org/10.1016/j.atmosenv.2010.06.001>, 2010.
- Valari, M., Markakis, K., Powaga, E., Collignan, B., and Perrussel, O.: EXPLUME v1.0: a model for personal exposure to ambient O<sub>3</sub> and PM<sub>2.5</sub>, *Geosci. Model Dev.*, 13, 1075–1094, <https://doi.org/10.5194/gmd-13-1075-2020>, 2020.
- 440 Wang, T., Liu, H., Li, J., Wang, S., Kim, Y., Sun, Y., Yang, W., Du, H., Wang, Z., and Wang, Z.: A two-way coupled regional urban–street network air quality model system for Beijing, China, *Geosci. Model Dev.*, 16, 5585–5599, <https://doi.org/10.5194/gmd-16-5585-2023>, 2023a.
- Wang, Y., Ma, Y., Muñoz-Esparza, D., Dai, J., Li, C., Lichtig, P., Tsang, R., Liu, C., Wang, T., and Brasseur, G.: Coupled mesoscale–microscale modeling of air quality in a polluted city using WRF-LES-Chem, *Atmos. Chem. Phys.*, 23, 5905–5927, <https://doi.org/10.5194/acp-23-5905-2023>, 2023b.

WHO: WHO global air quality guidelines: particulate matter (PM<sub>2.5</sub> and PM<sub>10</sub>), ozone, nitrogen dioxide, sulfur dioxide and carbon monoxide., WHO reports, <https://iris.who.int/bitstream/handle/10665/345329/9789240034228-eng.pdf>, 2021.

450 Yuan, C., Ng, E., and Norford, L.: Improving air quality in high-density cities by understanding the relationship between air pollutant dispersion and urban morphologies, *Build. Environ.*, 71, 245–258, <https://doi.org/10.1016/j.buildenv.2013.10.008>, 2014.

Zhong, J., Harrison, R. M., James Bloss, W., Visschedijk, A., and Denier van der Gon, H.: Modelling the dispersion of particle number concentrations in the West Midlands, UK using the ADMS-Urban model, *Environ. Int.*, 181, 108273, <https://doi.org/10.1016/j.envint.2023.108273>, 2023.
